# Supplementary material
Source: PubMed Central journal article supplement (PMC8777177)
Supplement: 41429_2022_504_MOESM1_ESM.pdf [file 41429_2022_504_MOESM1_ESM.pdf]

## Preventative treatment with Fluorothiazinon suppressed *Acinetobacter baumannii*-associated septicaemia in mice

Bondareva N.E., Soloveva A.V., Sheremet A.B., Koroleva E.A., Kapotina L.N., Morgunova E.Y., Luyksaar S.I., Zayakin E.S., Zigangirova N.A.

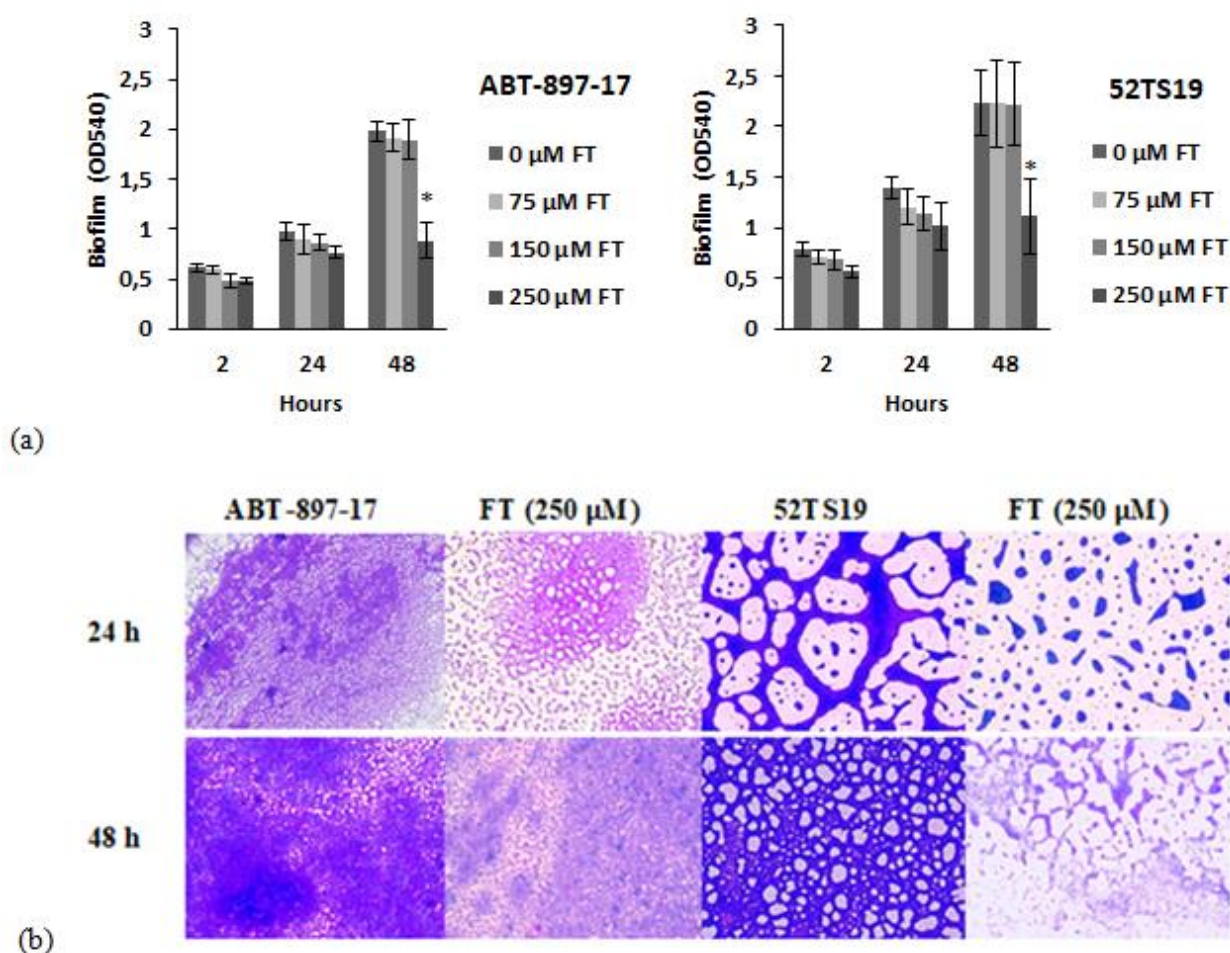

**FIG. S1. Effect of FT on the biofilm formation by two *A. baumannii* isolates measured by crystal violet staining.** (a) Effect of FT on the biofilm ABT-897-17 and 52TS19 isolates *A. baumannii*. Black - *A. baumannii* untreated control; light grey - *A. baumannii* treated with 75 µM of FT; grey - *A. baumannii* treated with 150 µM of FT; dark grey - *A. baumannii* treated with 250 µM of FT. Error bars represent standard deviation. \*  $p < 0.05$  versus untreated controls. Each isolate was tested in triplicate per experiment and in at least three experiments. (b) Light microscopic images of *A. baumannii* biofilm obtained by staining with CV, showing inhibition of biofilm under the action of FT at a concentration of 250 µM. Images were observed at 20× magnification.

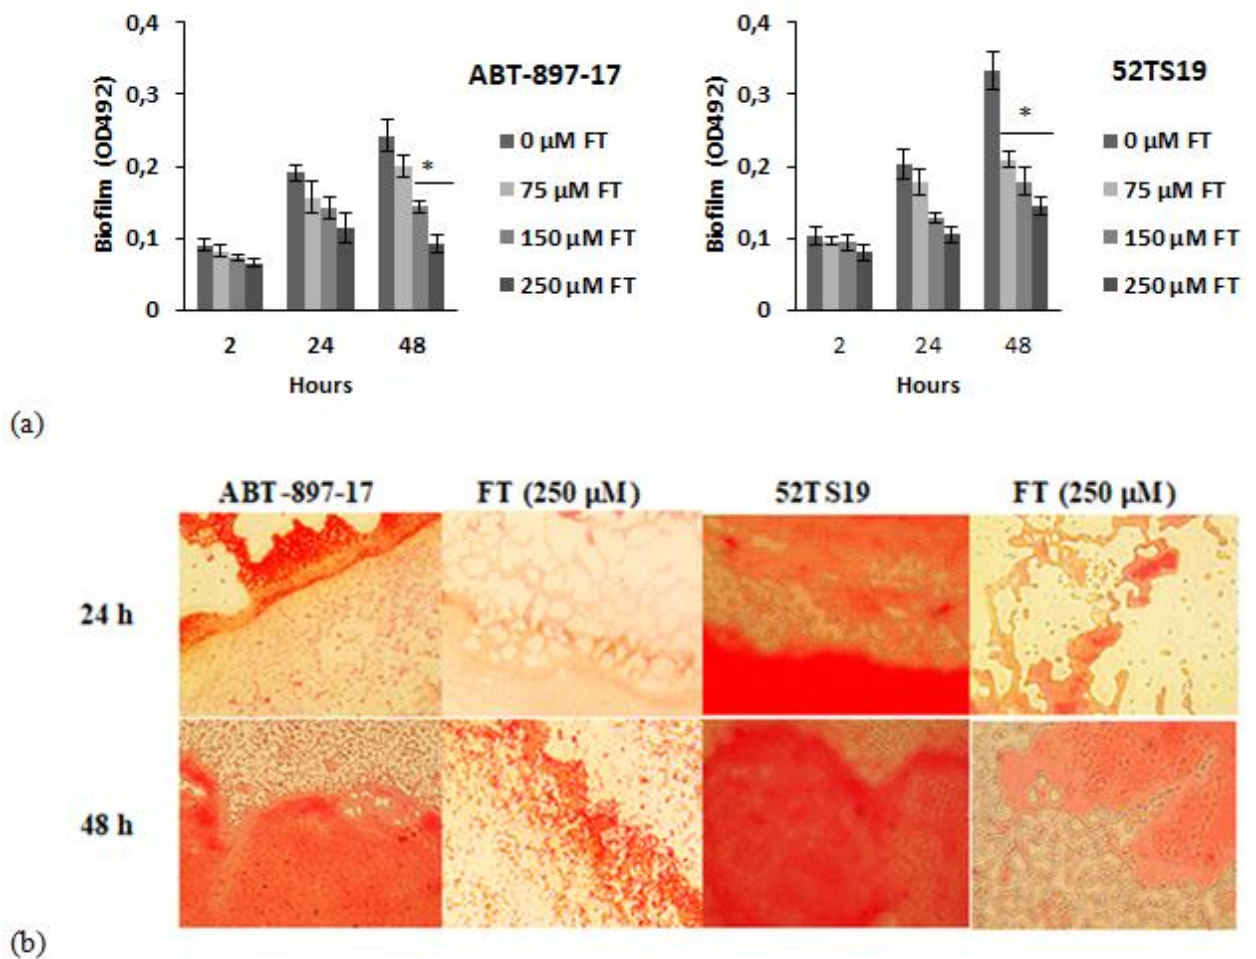

**FIG. S2. Effect of FT on the biofilm formation by two *A. baumannii* isolates measured by Congo red staining.** (a) Dose-dependent effect of FT on the biofilm ABT-897-17 and 52TS19 isolates *A. baumannii*. Black - *A. baumannii* untreated control; light grey - *A. baumannii* treated with 75 μM of FT; grey - *A. baumannii* treated with 150 μM of FT; dark grey - *A. baumannii* treated with 250 μM of FT. Error bars represent standard deviation. \*  $p < 0.05$  versus untreated controls. Each isolate was tested in triplicate per experiment and in at least three experiments. (b) Light microscopic images of *A. baumannii* biofilm obtained by staining with CR, showing significant decrease in the density of the matrix layer in biofilms after exposure to 250 μM of FT. Images were observed at 20× magnification.

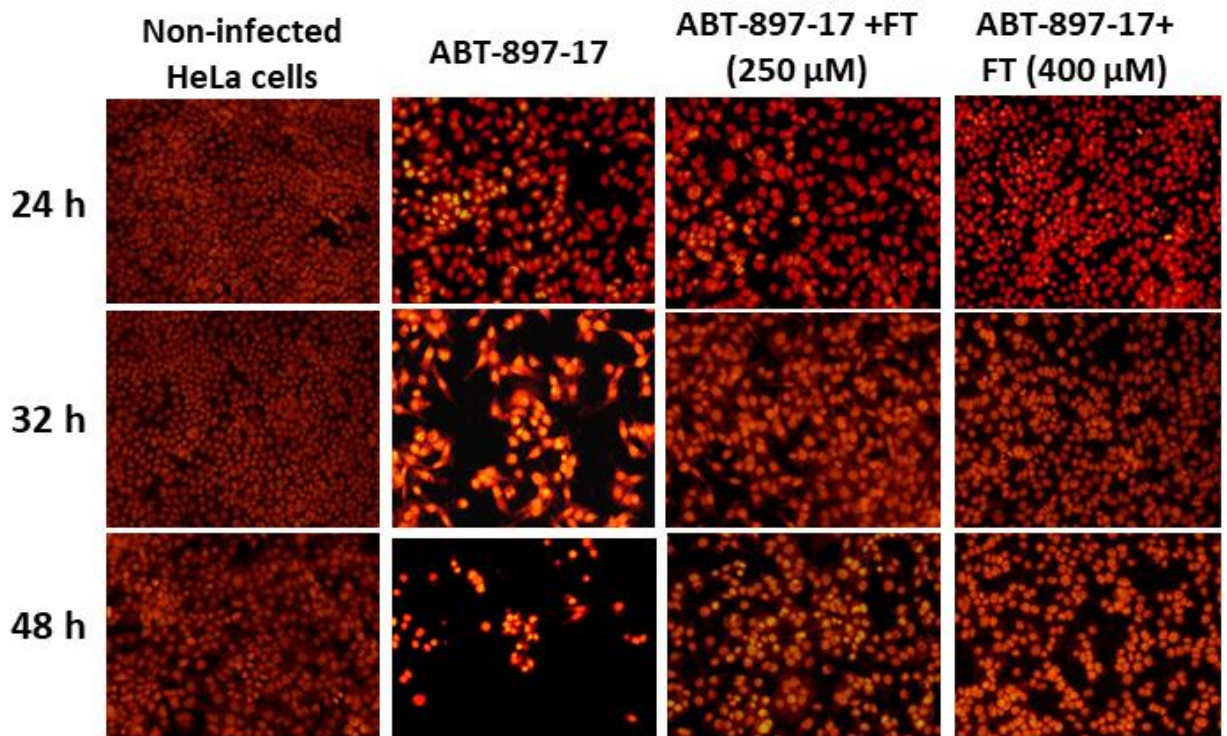

**FIG. S3. FT inhibits *A.baumannii* – induced cytotoxicity of HeLa cells.** HeLa cells were seeded into 24-well plates and infected with *A. baumannii* ABT-897-17 at MOI 1. FT was added to the experimental samples at a final concentration of 250 and 400  $\mu$ M. The cells were incubated for 24 and 48 h, were stained with bromide ethidium and analysed by fluorescence microscopy. Images were observed at 20 $\times$  magnification.
